# Supplementary material
Source: publisher figshare collection journal article supplement (https://acs.figshare.com/ndownloader/files/3773203)
Supplement: Supplementary file 1 [file 3773203]

## **SUPPLEMENTARY INFORMATION**

# **Highly Efficient Temperature-induced Visible Light Photocatalytic Hydrogen Production from Water**

Bing Han and Yun Hang Hu\*

*Department of Materials Science and Engineering, Michigan Technological University, 1400 Townsend Drive,  
Houghton, MI 49931-1295, USA*

## **CONTENT:**

### **1. Supplementary figures:**

- EPR spectra (Fig.S1)
- Product yield vs temperature (Fig. S2)
- Effect of H<sub>2</sub>O/methanol ratio on temperature-induced photocatalytic hydrogen production (Fig. S3)
- Results of control experiments comparing Pt, TiO<sub>2</sub>, and SiO<sub>2</sub> for photocatalytic hydrogen production (Fig. S4)

### **2. Supplementary Movie:**

- Photocatalytic hydrogen production process (Movie S1)

### **3. References**

## **1. SUPPLEMENTARY FIGURES:**

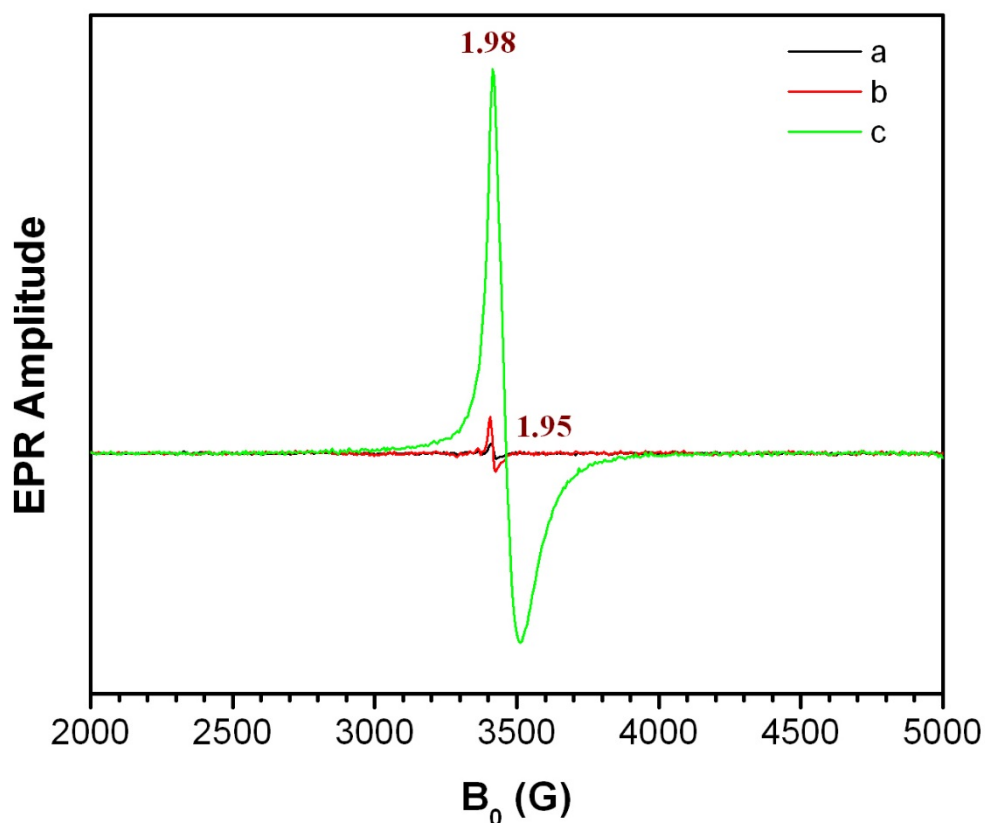

**Fig. S1.** EPR spectra of (a) pristine (white)  $\text{TiO}_2$ , (b)  $\text{Pt/TiO}_2$  without hydrogenation, and (c) black  $\text{Pt/TiO}_2$  prepared by hydrogenation. The spectra were recorded at 77 K with g value of 1.98 for white  $\text{TiO}_2$  and unreduced  $\text{Pt/TiO}_2$  and 1.95 for black  $\text{Pt/TiO}_2$ . It is well-known that a peak at  $g = 1.95\sim 1.98$  is characteristic of a paramagnetic  $\text{Ti}^{3+}$  center.<sup>S1</sup> The peak intensity of  $\text{Ti}^{3+}$  is very small for white  $\text{TiO}_2$  and unreduced  $\text{Pt/TiO}_2$ , indicating their negligible amount of  $\text{Ti}^{3+}$ . In contrast, the black  $\text{Pt/TiO}_2$  exhibits a large amount of  $\text{Ti}^{3+}$  associated with a large peak of  $\text{Ti}^{3+}$  in EPR spectrum.

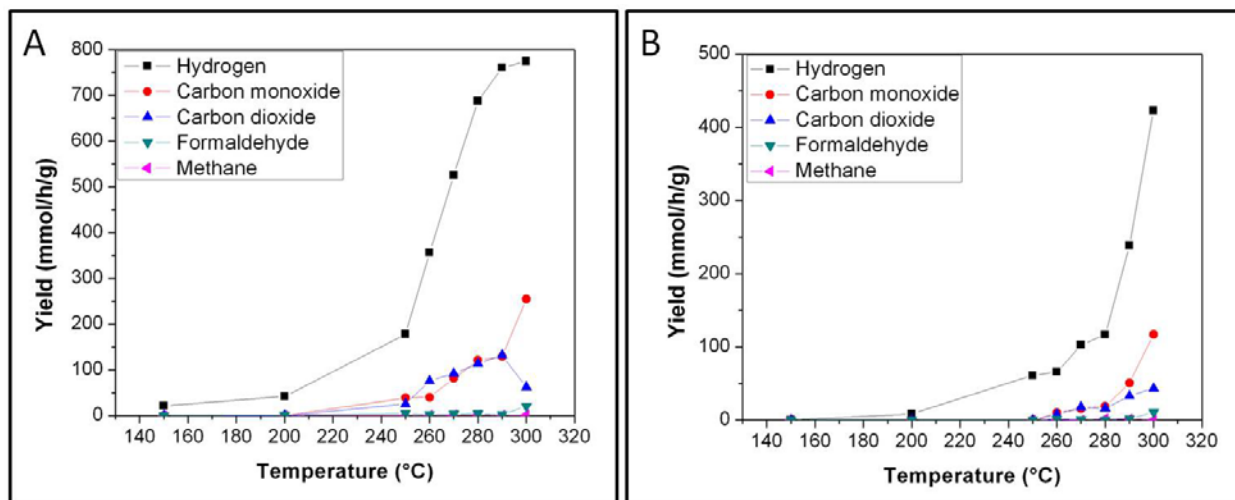

**Fig. S2.** Product yield vs reaction temperature for catalytic hydrogen production from H<sub>2</sub>O with methanol (30%, as a sacrificial agent) over black Pt/TiO<sub>2</sub> catalyst dispersed on light-diffuse-reflection-surface of a SiO<sub>2</sub> substrate with AM 1.5 global sunlight illumination (A) and without AM 1.5 global sunlight illumination (B).

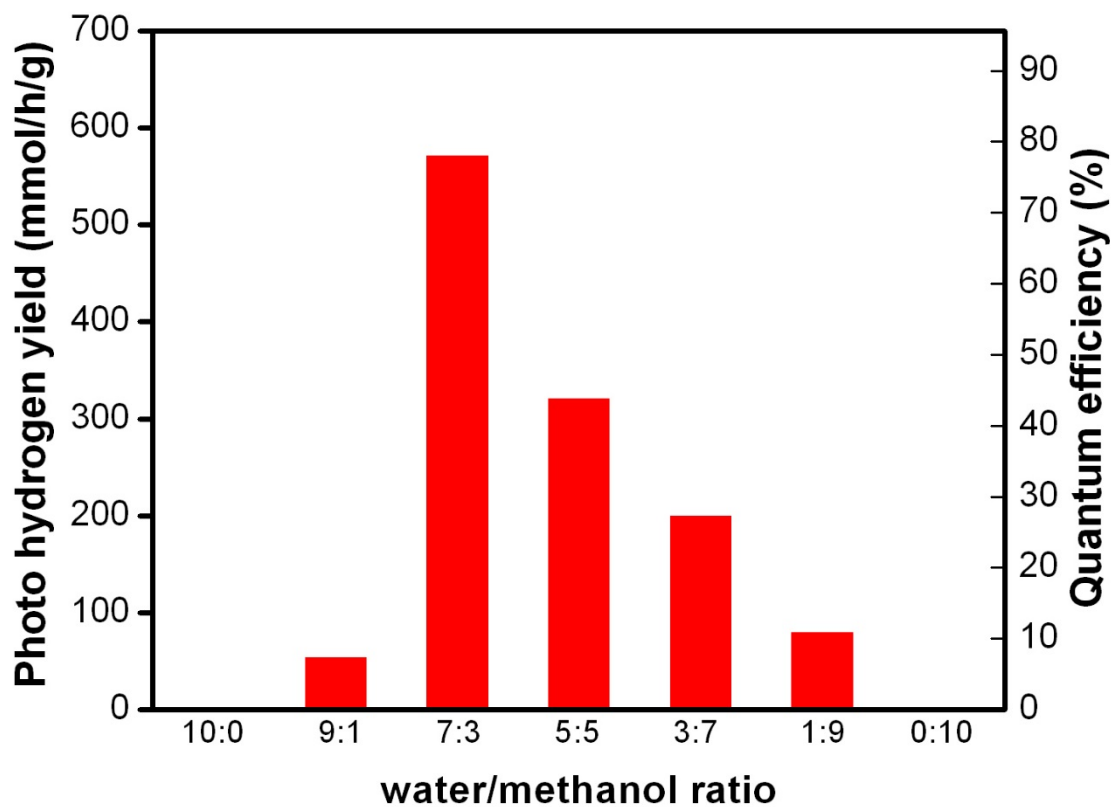

**Fig. S3.** Photocatalytic hydrogen production from H<sub>2</sub>O with methanol as a sacrificial agent over black Pt/TiO<sub>2</sub> catalyst dispersed on the light-diffuse-reflection-surface of SiO<sub>2</sub> substrate under AM 1.5 global sunlight illumination at 280 °C. Photo-hydrogen yield (equal to the difference of hydrogen yields with and without light irradiation) and apparent quantum efficiency increase with decreasing water/methanol ratio and then decreases. The maximum values can be obtained at water/methanol ratio of 7/3.

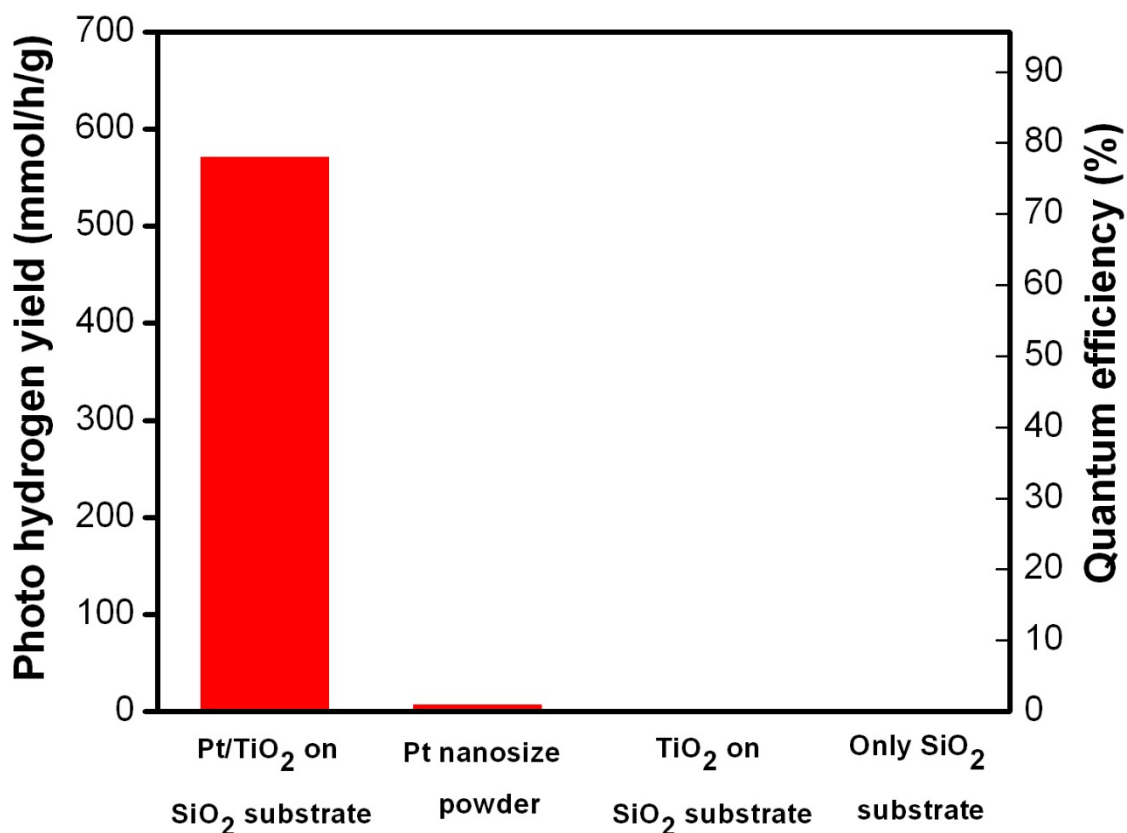

**Fig. S4.** Photocatalytic hydrogen production from H<sub>2</sub>O with 30% methanol as a sacrificial agent under AM 1.5 global sunlight illumination at 280 °C. Either SiO<sub>2</sub> substrate or TiO<sub>2</sub> on SiO<sub>2</sub> substrate doesn't exhibit photocatalytic activity. The photo-hydrogen yield and apparent quantum efficiency are negligible for Pt dispersed on SiO<sub>2</sub> substrate. Only black Pt/TiO<sub>2</sub> catalyst dispersed on SiO<sub>2</sub> substrate exhibits an excellent photo-hydrogen yield (571 mmol/h/gcat) with a high apparent quantum efficiency (78.0%).

## **2. SUPPLEMENTARY MOVIE**

A movie was recorded for the impressive photocatalytic hydrogen production process from water with 30% methanol as a sacrificial agent over black Pt/TiO<sub>2</sub> catalyst dispersed on the light-diffuse-reflection-surface of SiO<sub>2</sub> substrate under 1.5 AM global sunlight illumination at room temperature (please watch *Supplementary Movie S1*).

## **3. REFERENCES**

S1. Xing, M.; Zhang, J.; Chen, F.; Tian, B. An Economic Method to Prepare Vacuum Activated Photocatalysts with High Photo-activities and Photosensitivities, *Chem. Commun.* **2011**, 47, 4947-4949.
